# Supplementary material
Source: Royal Society of Chemistry journal article supplement (doi:10.1039/d6ja00017g)
Supplement: d6ja00017g1.pdf [file d6ja00017g1.pdf]

## Supporting Information

### Determination of organic arsenic acids by machine learning assisted

#### SERS on silicon modified silicon modified coating of Fe<sub>3</sub>O<sub>4</sub>@Ag

Ziqi Zhang<sup>† 1,2</sup>, Jianrong Tian<sup>† 1,2</sup>, Huaqing Ling<sup>1,2</sup>, Zhixi Zhao<sup>1,2,3</sup>, Shan Chen<sup>1,2</sup>, Zulihaya Maimaiti<sup>1,2</sup>, Yufang Ye<sup>1</sup>, Qing Wang<sup>1</sup>, Yongbin Li<sup>4</sup>

<sup>1</sup>College of Chemistry and Chemical Engineering, Xinjiang Normal University, Urumqi 830000, China

<sup>2</sup>Xinjiang Key Laboratory of Energy Storage and Photoelectrolytic Materials, Urumqi 830000, China

<sup>3</sup>Technical Research Center for Environmental Geotechnical Engineering Restoration and Resource Utilization, Xinjiang Normal University, Urumqi 830054, China

<sup>4</sup>School of Environment Science, Dalian University of Technology, Dalian 116000, China

The stability of the substrate was calculated from the relative standard deviation (RSD).

According to the relative standard deviation (RSD):

$$RSD = S \div \bar{X} \times 100\% \quad (S1)$$

where S was calculated as follows: 
$$S = \sqrt{\frac{\sum_{i=1}^n (x_i - \bar{x})^2}{n-1}}$$

where S was the standard deviation of the spectral intensity and  $\bar{X}$  was the corresponding mean value.

The Analytical Enhancement Factor (AEF) stood as a pivotal metric in assessing the SERS efficacy of a substrate<sup>1</sup>. AEF was calculated using Equation S2, which represents

$$EF = \frac{I_{SERS}}{N_{SERS}} \times \frac{N_{NR}}{I_{NR}} \quad (S2)$$

Where,  $I_{SERS}$  represents the signal intensity of the characteristic peak of organic arsenic acid (500.0  $\mu\text{g/L}$ ) measured utilizing  $\text{Fe}_3\text{O}_4@\text{SiO}_2@\text{Ag}$  NPs as the SERS substrate, and  $N_{SERS}$  denotes the count of effective organic arsenic acid molecules on the surface of the  $\text{Fe}_3\text{O}_4@\text{SiO}_2@\text{Ag}$  NPs substrate under irradiation.  $I_{NR}$  is the Raman signal intensity of the organic arsenic acid at a concentration of 1 mol/L, and  $N_{NR}$  is the count of effective organic arsenic acid molecules illuminated by the laser spot.

$$\text{Accuracy} = 100 \times \frac{\text{True Positives} + \text{True Negatives}}{\text{True Positives} + \text{True Negatives} + \text{False Positives} + \text{False Negatives}} \quad (S3)$$

$$\text{Sensitivity} = 100 \times \frac{\text{True Positives}}{\text{True Positives} + \text{False Negatives}} \quad (S4)$$

$$\text{Specificity} = 100 \times \frac{\text{True Negatives}}{\text{True Negatives} + \text{False Positives}} \quad (S5)$$

$$\text{Precision} = 100 \times \frac{\text{True Positives}}{\text{True Positives} + \text{False Positives}} \quad (S6)$$

Table S1 Mass yield of each synthesis step for Fe<sub>3</sub>O<sub>4</sub>@SiO<sub>2</sub>@Ag nanoparticles

| Synthesis Step                         | Starting Material                                | Starting | Theoretical | Product  | Yield (%) |
|----------------------------------------|--------------------------------------------------|----------|-------------|----------|-----------|
|                                        |                                                  | Mass (g) | Mass (g)    | Mass (g) |           |
| Step 1: Fe <sub>3</sub> O <sub>4</sub> | FeCl <sub>3</sub> ·6H <sub>2</sub> O             | 2.1      | 0.60        | 0.47     | 78.3%     |
| Step 2: SiO <sub>2</sub> coating       | Fe <sub>3</sub> O <sub>4</sub>                   | 0.2      | 0.37        | 0.23     | 62.2%     |
| Step 3: Ag                             | Fe <sub>3</sub> O <sub>4</sub> @SiO <sub>2</sub> | 0.05     | 0.17        | 0.15     | 88.2%     |

\*Theoretical basis is calculated based on stoichiometric ratios

Table S2 Peak coordination of DMA and ROX in normal Raman and SERS spectra

| Assignments                           | Cacodylic acid(cm) <sup>-1</sup> |          | Roxarsone(cm) <sup>-1</sup> |            | Ref       |
|---------------------------------------|----------------------------------|----------|-----------------------------|------------|-----------|
|                                       | Normal Raman                     | SERS     | Normal Raman                | SERS       |           |
| $\nu(\text{As-C})$                    | /                                | /        | 619                         | 622        | 2         |
| $\nu_s(\text{As-OH})$                 | /                                | /        | 750                         | /          |           |
| $\nu(\text{AsOx})$                    | /                                | /        | 809                         | 799        |           |
| $\nu_s(\text{NO}_2)$                  | /                                | /        | 1335                        | 1323       |           |
| $\nu(\text{As-C})$                    | 598,633                          | 610, 640 | 637                         | 633        | 3         |
| $\nu_s(\text{As-OH})$                 | 777                              | 749      | 744                         | 700        |           |
| $\nu_s, \nu_{\text{as}}(\text{As=O})$ | 816                              | 832      | 862                         | 824        |           |
| $\nu_s(\text{NO}_2)$                  | /                                | /        | 1263                        | 1332, 1356 | 4         |
| $\nu(\text{As-C})$                    | /                                | /        | 637                         | 627        |           |
| $\nu_s(\text{As-OH})$                 | /                                | /        | 744                         | /          |           |
| $\nu(\text{AsOx})$                    | /                                | /        | 824                         | 797        |           |
| $\nu_s(\text{NO}_2)$                  | /                                | /        | 1342                        | 1322       | 5         |
| $\nu(\text{As-C})$                    | 658                              | /        | /                           | /          |           |
| $\nu_s(\text{As-OH})$                 | 752                              | /        | /                           | /          |           |
| $\nu(\text{As-C})$                    | /                                | 600      | /                           | /          | 6         |
| $\nu(\text{As-O})$                    | /                                | 830      | /                           | /          |           |
| $\nu(\text{As-C})$                    | 634                              | 666      | 619                         | 617        | This work |
| $\nu_s(\text{As-OH})$                 | 755                              | 803      | /                           | /          |           |
| $\nu(\text{AsOx})$                    | /                                | /        | 810                         | 797        |           |
| $\nu_s(\text{NO}_2)$                  | /                                | /        | 1332                        | 1334       |           |

Table S3 Composition of natural surface water samples

| Composition   | $\rho(\text{mg/L})$ | Composition        | $\rho(\text{mg/L})$ |
|---------------|---------------------|--------------------|---------------------|
| $\text{K}^+$  | 2.918               | $\text{Cl}^-$      | 12.309              |
| $\text{Na}^+$ | 52.014              | $\text{SO}_4^{2-}$ | 214.320             |
| $\text{Ca}^+$ | 87.829              | $\text{HCO}_3^-$   | 196.114             |
| $\text{Mg}^+$ | 27.966              | $\text{NO}_3^-$    | 2.210               |

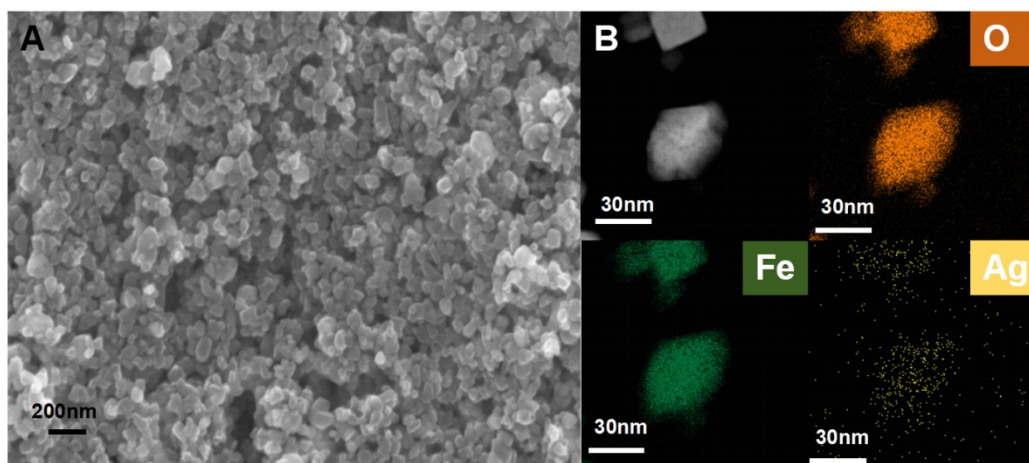

Fig. S1 Characterization of  $\text{Fe}_3\text{O}_4@\text{Ag}$ . SEM image(A), TEM image of  $\text{Fe}_3\text{O}_4@\text{Ag}$  (B)

elemental analysis of energy dispersive spectroscopy (EDS)

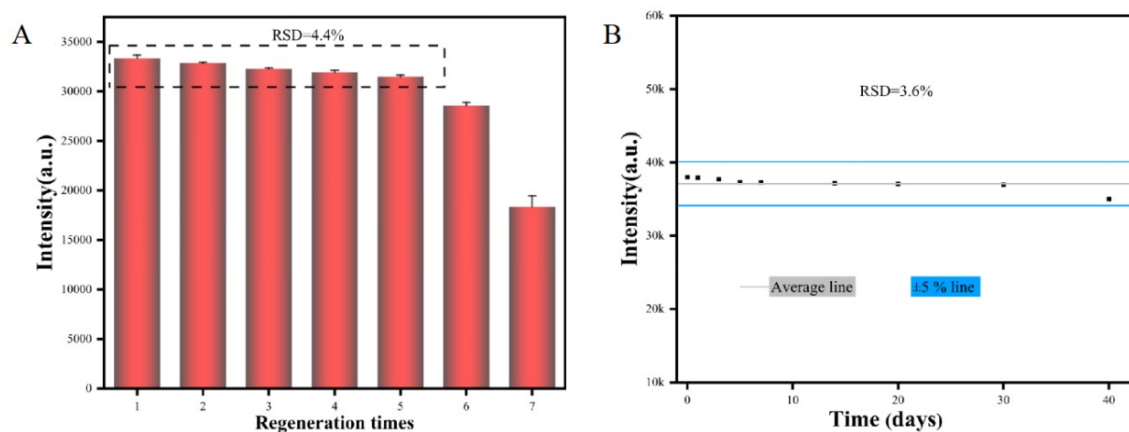

Fig. S2 Regeneration test of  $\text{Fe}_3\text{O}_4@\text{SiO}_2@\text{Ag}$  (A) and stability of the  $\text{Fe}_3\text{O}_4@\text{SiO}_2@\text{Ag}$  (B).

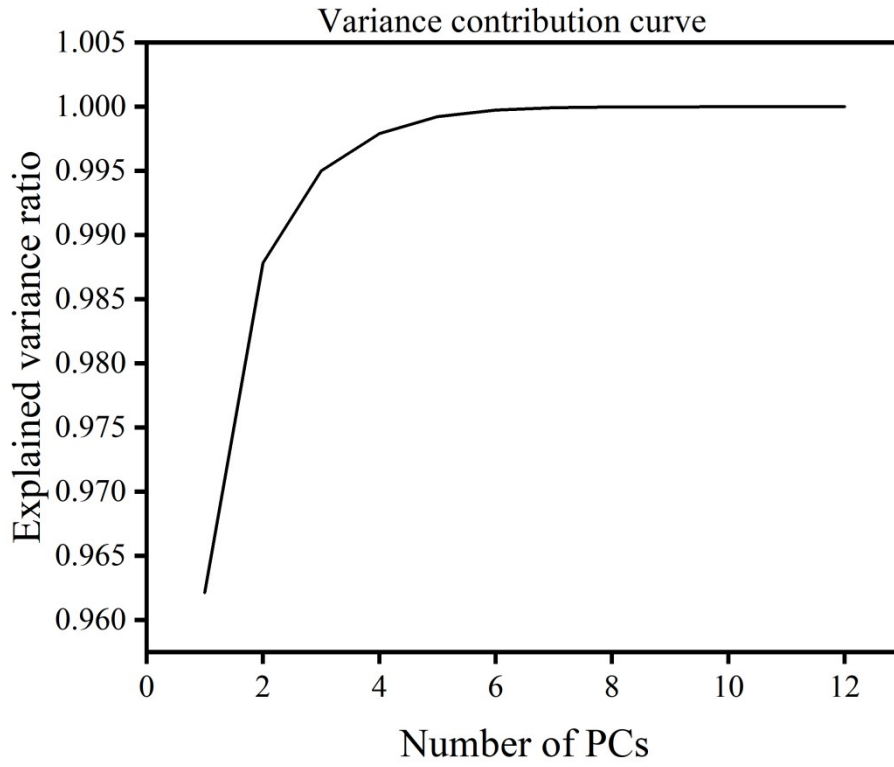

Fig. S3 The contribution rate of the principal component characteristic variance

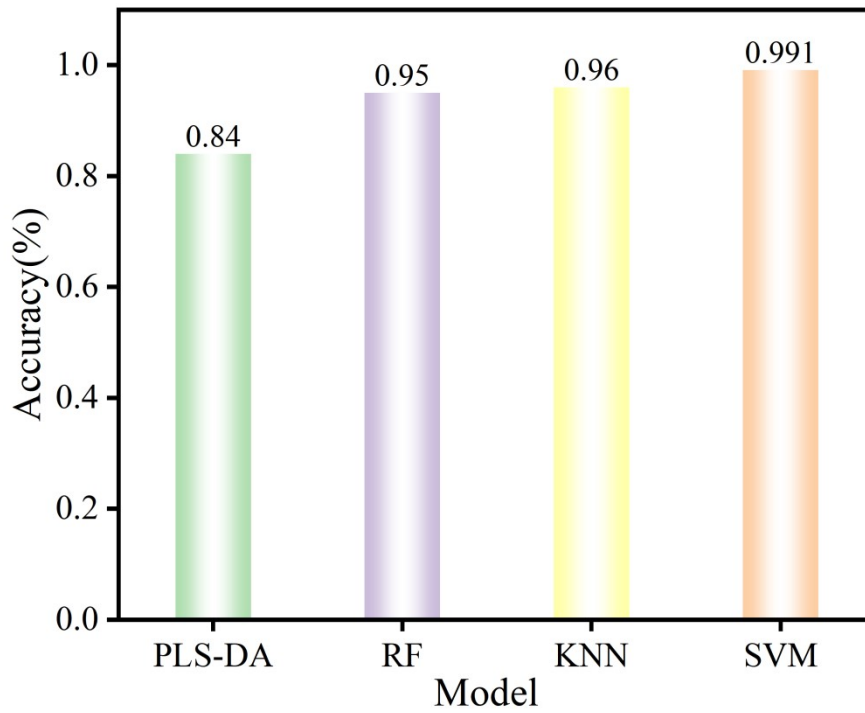

Fig. S4 Classification accuracies of four machine learning models

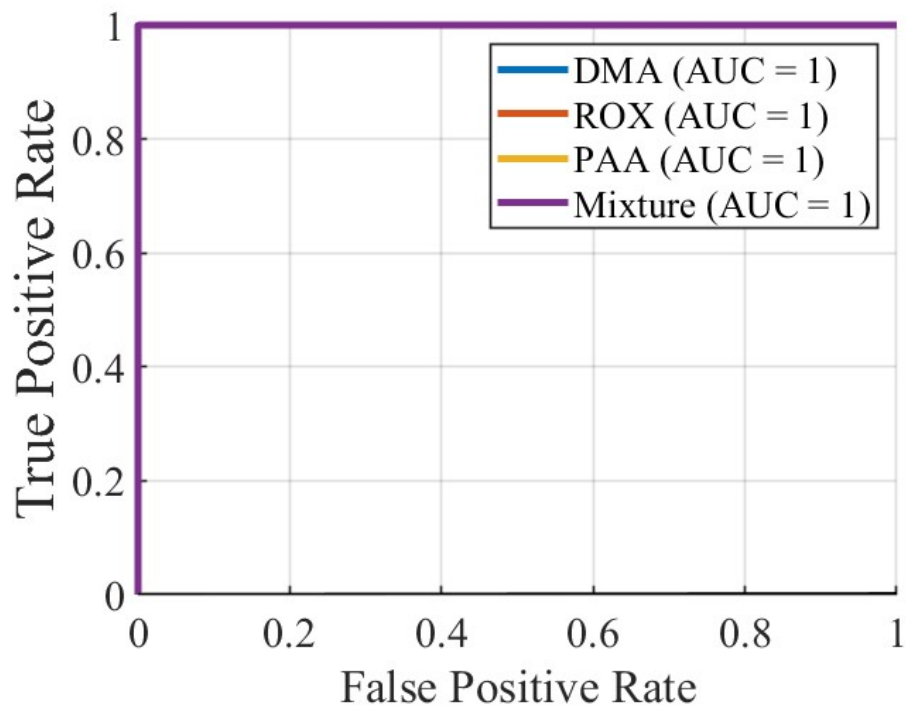

Fig. S5 ROC curve of validation set result by the trained support vector machinest model

## Reference

1. E. Cara, L. Mandrile, A. Sacco, A. M. Giovannozzi, A. M. Rossi, F. Celegato, N. De Leo, P. Hönicke, Y. Kayser, B. Beckhoff, D. Marchi, A. Zoccante, M. Cossi, M. Laus, L. Boarino and F. Ferrarese Lupi, *J MATER CHEM C*, 2020, 8, 16513-16519. <http://doi.org/10.1039/D0TC04364H>.
2. J. Olavarria-Fullerton, S. Wells, W. Ortiz-Rivera, M. J. Sepaniak and M. A. De Jesus, *APPL SPECTROSC*, 2011, 65, 423-428. <https://10.1366/10-06116>.
3. R. López, F. J. Pereira, D. Suarez and A. J. Aller, *MICROCHEM J*, 2022, 175, 107186. <https://doi.org/10.1016/j.microc.2022.107186>.
4. S. Xu, F. P. Sabino, A. Janotti, D. B. Chase, D. L. Sparks and J. F. Rabolt, *The Journal of Physical Chemistry A*, 2018, 122, 9474-9482. <https://doi.org/10.1021/acs.jpca.8b09104>
5. S. Cowen, M. Duggal, T. Hoang and H. A. Al-Abadleh, *CAN J CHEM*, 2008, 86, 942-950. <https://doi.org/10.1139/v08-102>
6. M. Yang, V. Liamtsau, C. Fan, K. L. Sylvers, A. J. McGoron, G. Liu, F. Fu and Y. Cai, *ANAL CHEM*, 2019, 91, 8280-8288. <https://10.1021/acs.analchem.9b00999>.
